# Supplementary material for: Quantifying climate sensitivity and climate-driven change in North American amphibian communities
Source: PubMed Central journal article supplement (PMC6156563; doi:10.1038/s41467-018-06157-6), 2018-09-25
Supplement: 41467_2018_6157_MOESM2_ESM.pdf [file 41467_2018_6157_MOESM2_ESM.pdf]

## **Description of Additional Supplementary Files:**

Supplementary Data 1. **Code used to fit model in JAGS.** The code fits the full hierarchical model used to derive climate sensitivities.

Supplementary Data 2. **Species trait data.** A list of species included in analyses and trait values used in analyses.

Supplementary Data 3. **Time-series specific estimates.** Estimates of sensitivity and climate driven trend for each of the time-series in the analysis (i.e., a unique combination of species and study area).
